# Supplementary material
Source: Springer Nature journal article supplement (https://www.springerprofessional.de/resource/supplementary/13638_2012_729_MOESM3_ESM.pdf/11898280)

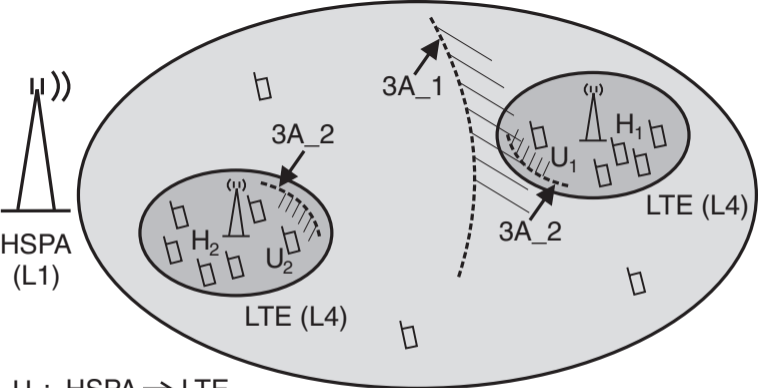

$U_1$ : HSPA  $\rightarrow$  LTE

$U_2$ : HSPA  $\nrightarrow$  LTE

Supplement: MOESM3 [file 11898280]
